# Supplementary material for: Measuring Effects of Counseling to Increase Pre-Exposure Prophylaxis Adherence and Partner Support in South Africa Using the Healthy Relationship Assessment Tool
Source: PubMed Central journal article supplement (PMC10615234; doi:10.9745/ghsp-d-22-00075), 2023-10-30

## SUPPLEMENT

**FIGURE S1.** Distribution of Healthy Relationship Assessment Tool Scale Scores by Module Recommendation for CHARISMA Trial Participants at Enrollment

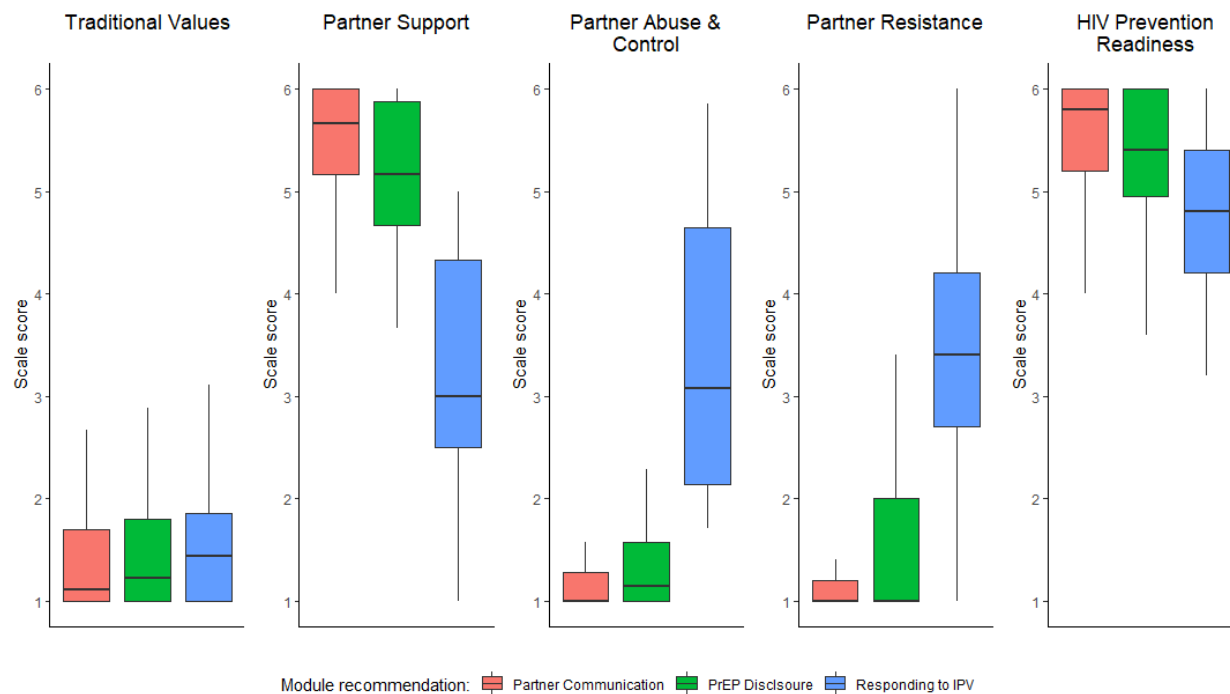

Abbreviations: CHARISMA, Community Health clinic model for Agency in Relationships and Safer Microbicide Adherence; IPV, intimate partner violence; PrEP, pre-exposure prophylaxis.

**TABLE S1.** Mean and Standard Deviation of Healthy Relationship Assessment Tool Scale Scores over Time by Module Received at Enrollment

| Module Received             | Partner Communication<br>(n=130) |                |                | PrEP Disclosure<br>(n=66) |                |             | Responding to IPV<br>(n=19) |                |             |
|-----------------------------|----------------------------------|----------------|----------------|---------------------------|----------------|-------------|-----------------------------|----------------|-------------|
|                             | Enroll-<br>ment                  | Month<br>3     | Month<br>6     | Enroll-<br>ment           | Month<br>3     | Month<br>6  | Enroll-<br>ment             | Month<br>3     | Month<br>6  |
| Traditional Values          | 1.54<br>(0.86)                   | 2.85<br>(2.31) | 1.83<br>(0.24) | 1.62<br>(0.87)            | 1.19<br>(0.32) | 1.22<br>(0) | 1.83<br>(0.95)              | 1.19<br>(0.32) | 1.00<br>(0) |
| Partner Support             | 5.40<br>(0.76)                   | 5.89<br>(0.19) | 5.83<br>(0.24) | 5.10<br>(0.92)            | 5.39<br>(0.79) | 4.83<br>(0) | 3.09<br>(1.14)              | 3.27<br>(1.97) | 5.00<br>(0) |
| Partner Abuse &<br>Control  | 1.24<br>(0.43)                   | 1.00<br>(0)    | 1.14<br>(0.20) | 1.36<br>(0.64)            | 1.05<br>(0.08) | 2.00<br>(0) | 3.49<br>(1.15)              | 3.29<br>(2.23) | 1.71<br>(0) |
| Partner Resistance          | 1.29<br>(0.59)                   | 1.00<br>(0)    | 1.90<br>(0.71) | 1.63<br>(0.90)            | 1.07<br>(0.12) | 1.00<br>(0) | 3.44<br>(1.26)              | 4.60<br>(1.22) | 1.00<br>(0) |
| HIV Prevention<br>Readiness | 5.52<br>(0.71)                   | 5.80<br>(0.20) | 5.30<br>(0.99) | 5.17<br>(1.00)            | 5.80<br>(0.35) | 5.20<br>(0) | 4.69<br>(0.97)              | 4.67<br>(0.61) | 5.80<br>(0) |

Abbreviations: IPV, intimate partner violence; PrEP, pre-exposure prophylaxis.

**FIGURE S2.** Distribution of Healthy Relationship Assessment Tool Scale Scores at Month 6, by Arm

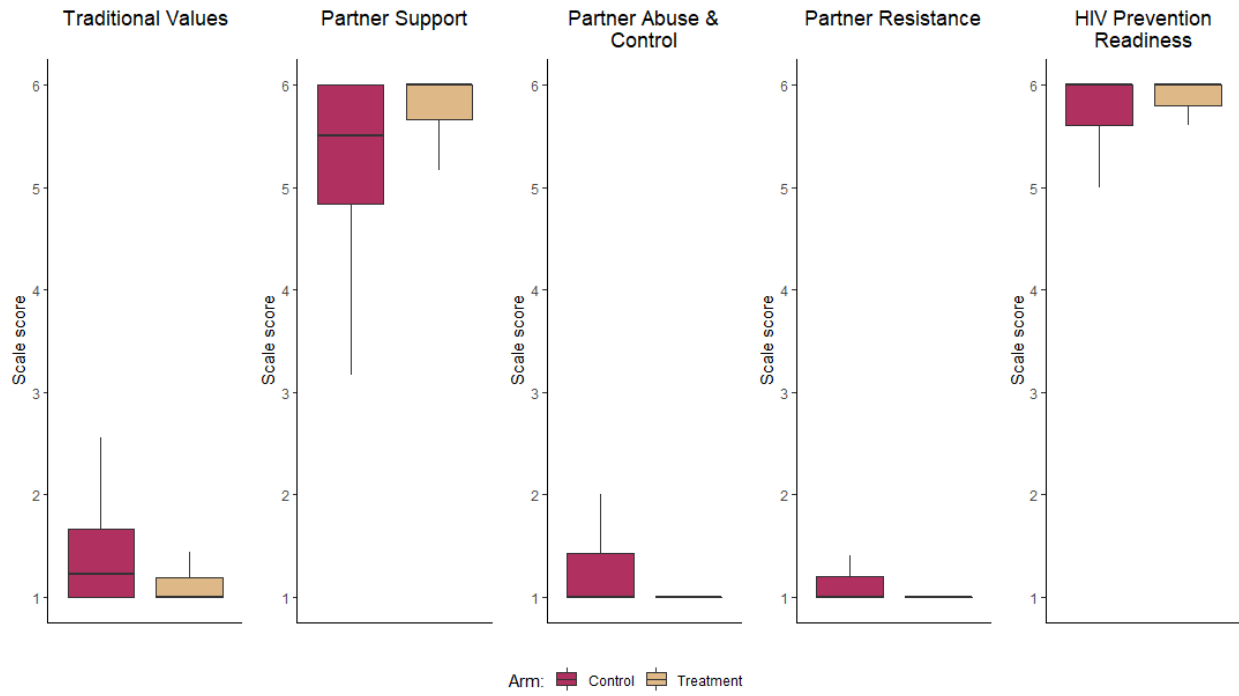

Supplement: GHSP-D-22-00075-supplement.pdf [file GHSP-D-22-00075-supplement.pdf]
